# Supplementary material
Source: MDPI journal article supplement (https://www.mdpi.com/2311-5637/10/4/191)
Supplement: s1 [file s1]

Supplementary Table S1. Mean concentration (n=3)  $\pm$  standard deviation of the main quality control parameters of wines at the end of the fermentation in Gewürztraminer. Data are compared with ANOVA followed by Tukey HSD multiple comparison ( $p < 0.05$ ). Different letters indicate values statistically differentiated.

|                         | SC                            | S.24                          | S.48                          | C80                           | C98                            | S.100                         |
|-------------------------|-------------------------------|-------------------------------|-------------------------------|-------------------------------|--------------------------------|-------------------------------|
| Ethanol (% vol)         | 13.19 $\pm$ 0.06 <sup>a</sup> | 13.27 $\pm$ 0.05 <sup>a</sup> | 13.28 $\pm$ 0.3 <sup>a</sup>  | 13.18 $\pm$ 0.01 <sup>a</sup> | 13.15 $\pm$ 0.12 <sup>a</sup>  | 13.51 $\pm$ 0.05 <sup>a</sup> |
| Glucose+Fructose (g/L)  | 1.56 $\pm$ 1.35 <sup>a</sup>  | 3.83 $\pm$ 0.93 <sup>a</sup>  | 3.71 $\pm$ 5.31 <sup>a</sup>  | 4.05 $\pm$ 0.89 <sup>a</sup>  | 6.72 $\pm$ 2.39 <sup>a</sup>   | 4.64 $\pm$ 1.61 <sup>a</sup>  |
| pH                      | 3.39 $\pm$ 0.01 <sup>b</sup>  | 3.42 $\pm$ 0 <sup>b</sup>     | 3.41 $\pm$ 0.02 <sup>b</sup>  | 3.40 $\pm$ 0.01 <sup>b</sup>  | 3.41 $\pm$ 0.01 <sup>b</sup>   | 3.55 $\pm$ 0.01 <sup>a</sup>  |
| Titrate acidity (g/L)   | 4.91 $\pm$ 0.3 <sup>a</sup>   | 4.04 $\pm$ 0.06 <sup>c</sup>  | 3.97 $\pm$ 0.04 <sup>c</sup>  | 4.23 $\pm$ 0.03 <sup>bc</sup> | 4.06 $\pm$ 0.25 <sup>c</sup>   | 4.68 $\pm$ 0.07 <sup>ab</sup> |
| Volatile acidity (g/L)  | 0.58 $\pm$ 0.03 <sup>ab</sup> | 0.62 $\pm$ 0.02 <sup>a</sup>  | 0.48 $\pm$ 0.06 <sup>b</sup>  | 0.58 $\pm$ 0.02 <sup>ab</sup> | 0.53 $\pm$ 0.05 <sup>ab</sup>  | 0.52 $\pm$ 0.07 <sup>ab</sup> |
| Total dry extract (g/L) | 24.8 $\pm$ 2.2 <sup>a</sup>   | 24.2 $\pm$ 0.8 <sup>a</sup>   | 24.2 $\pm$ 4.6 <sup>a</sup>   | 24.9 $\pm$ 0.6 <sup>a</sup>   | 27.1 $\pm$ 2.5 <sup>a</sup>    | 27.6 $\pm$ 1.4 <sup>a</sup>   |
| Malic acid (g/L)        | 1.24 $\pm$ 0.07 <sup>a</sup>  | 0.97 $\pm$ 0.08 <sup>b</sup>  | 0.99 $\pm$ 0.05 <sup>b</sup>  | 1.01 $\pm$ 0.03 <sup>b</sup>  | 0.99 $\pm$ 0.12 <sup>b</sup>   | 1.07 $\pm$ 0.02 <sup>ab</sup> |
| Lactic acid (g/L)       | 0.57 $\pm$ 0.72 <sup>a</sup>  | 0.01 $\pm$ 0.01 <sup>a</sup>  | 0.08 $\pm$ 0.09 <sup>a</sup>  | 0.08 $\pm$ 0.07 <sup>a</sup>  | 0.03 $\pm$ 0.04 <sup>a</sup>   | 0.13 $\pm$ 0.04 <sup>a</sup>  |
| Tartaric acid ( g/L)    | 1.53 $\pm$ 0.01 <sup>c</sup>  | 1.64 $\pm$ 0.01 <sup>bc</sup> | 1.71 $\pm$ 0.08 <sup>b</sup>  | 1.62 $\pm$ 0.07 <sup>bc</sup> | 1.73 $\pm$ 0.05 <sup>b</sup>   | 3.05 $\pm$ 0.08 <sup>a</sup>  |
| Ashes (g/L)             | 1.72 $\pm$ 0.19 <sup>b</sup>  | 1.75 $\pm$ 0.03 <sup>b</sup>  | 1.80 $\pm$ 0.16 <sup>b</sup>  | 1.75 $\pm$ 0.05 <sup>b</sup>  | 1.88 $\pm$ 0.06 <sup>b</sup>   | 2.67 $\pm$ 0.01 <sup>a</sup>  |
| Glycerol (g/L)          | 9.18 $\pm$ 0.1 <sup>a</sup>   | 7.92 $\pm$ 0.2 <sup>bc</sup>  | 7.31 $\pm$ 0.18 <sup>cd</sup> | 8.26 $\pm$ 0.09 <sup>b</sup>  | 7.73 $\pm$ 0.49 <sup>bcd</sup> | 7.17 $\pm$ 0.19 <sup>d</sup>  |
| Potassium (g/L)         | 0.63 $\pm$ 0.2 <sup>b</sup>   | 0.47 $\pm$ 0.02 <sup>b</sup>  | 0.53 $\pm$ 0.04 <sup>b</sup>  | 0.51 $\pm$ 0.04 <sup>b</sup>  | 0.54 $\pm$ 0.05 <sup>b</sup>   | 1.07 $\pm$ 0.02 <sup>a</sup>  |

Supplementary Table S2. Volatile compounds analyzed at the end of the alcoholic fermentation in Gewürztraminer wines. Values are means of three replicates  $\pm$  SD. Data are analyzed with one-way Anova followed by HSD Tukey's test. Different superscript letters denote significant difference ( $P < 0.05$ ) among yeast treatments within the same grape variety.

|          |                         | Gewürztraminer                      |                                    |                                    |                                     |                                    |                                    |
|----------|-------------------------|-------------------------------------|------------------------------------|------------------------------------|-------------------------------------|------------------------------------|------------------------------------|
|          | Compounds ( $\mu$ g/L)  | SC                                  | S.24                               | S.48                               | C80                                 | C98                                | S.100                              |
| Acetates | 2-phenylethyl acetate   | 682.03 $\pm$ 55.44 <sup>c</sup>     | 3598.56 $\pm$ 225.85 <sup>a</sup>  | 3374.93 $\pm$ 362.85 <sup>a</sup>  | 2634.1 $\pm$ 296.72 <sup>b</sup>    | 3582.93 $\pm$ 53.79 <sup>a</sup>   | 3326.26 $\pm$ 345.44 <sup>ab</sup> |
|          | ethylphenyl acetate     | 0.76 $\pm$ 0.05 <sup>a</sup>        | 0.36 $\pm$ 0.05 <sup>bc</sup>      | 0.2 $\pm$ 0 <sup>c</sup>           | 0.43 $\pm$ 0.05 <sup>b</sup>        | 0.3 $\pm$ 0.1 <sup>bc</sup>        | 0.36 $\pm$ 0.05 <sup>bc</sup>      |
|          | isobutyl acetate        | 3.74 $\pm$ 0.21 <sup>ab</sup>       | 2.48 $\pm$ 0.51 <sup>bc</sup>      | 1.55 $\pm$ 0.34 <sup>c</sup>       | 4.61 $\pm$ 0.26 <sup>a</sup>        | 2.23 $\pm$ 1.1 <sup>c</sup>        | 4.2 $\pm$ 0 <sup>a</sup>           |
|          | isopentyl acetate       | 4124.83 $\pm$ 337.19 <sup>ab</sup>  | 3268.8 $\pm$ 569.98 <sup>b</sup>   | 2412.96 $\pm$ 713.16 <sup>b</sup>  | 5254.8 $\pm$ 268.08 <sup>a</sup>    | 3274.53 $\pm$ 1251.69 <sup>b</sup> | 338.26 $\pm$ 4.4 <sup>c</sup>      |
|          | n-butyl acetate         | 102.4 $\pm$ 7.1 <sup>ab</sup>       | 76.83 $\pm$ 12.74 <sup>bc</sup>    | 54.83 $\pm$ 16.18 <sup>c</sup>     | 129.13 $\pm$ 7.57 <sup>a</sup>      | 75.83 $\pm$ 28.34 <sup>bc</sup>    | 92.33 $\pm$ 5.48 <sup>abc</sup>    |
|          | n-hexyl acetate         | 51.23 $\pm$ 1.67 <sup>a</sup>       | 41.66 $\pm$ 7.64 <sup>a</sup>      | 48.16 $\pm$ 6.92 <sup>a</sup>      | 44.06 $\pm$ 3.09 <sup>a</sup>       | 46.23 $\pm$ 8.72 <sup>a</sup>      | 37.9 $\pm$ 0.49 <sup>a</sup>       |
| Alcohols | 1-hexanol               | 845.1 $\pm$ 24.1 <sup>d</sup>       | 1474.53 $\pm$ 127.23 <sup>bc</sup> | 1743.16 $\pm$ 193.37 <sup>ab</sup> | 1130.9 $\pm$ 54.92 <sup>cd</sup>    | 1473.73 $\pm$ 213.69 <sup>bc</sup> | 2011.23 $\pm$ 56.34 <sup>a</sup>   |
|          | 3-methylthio-1-propanol | 992.2 $\pm$ 29.23 <sup>a</sup>      | 532.8 $\pm$ 47.18 <sup>b</sup>     | 504.56 $\pm$ 35.76 <sup>bc</sup>   | 461.83 $\pm$ 5.68 <sup>bc</sup>     | 437.5 $\pm$ 33.65 <sup>c</sup>     | 481.36 $\pm$ 9.25 <sup>bc</sup>    |
|          | 2-phenyl ethanol        | 28919.36 $\pm$ 2217.29 <sup>a</sup> | 9409.33 $\pm$ 456.51 <sup>bc</sup> | 8366.46 $\pm$ 417.25 <sup>c</sup>  | 12237.53 $\pm$ 1043.53 <sup>b</sup> | 8885.56 $\pm$ 1008.67 <sup>c</sup> | 9250.83 $\pm$ 644.75 <sup>bc</sup> |

|                      |                        |                |                 |                  |                 |                 |                 |
|----------------------|------------------------|----------------|-----------------|------------------|-----------------|-----------------|-----------------|
| <i>Ethyl esters</i>  | benzyl alcohol         | 20.9±2.48b     | 29.5±0.78a      | 29.73±0.4a       | 27.23±0.35ab    | 27.83±0.77ab    | 29.83±7.01a     |
|                      | cis-3-hexen-1-ol       | 14.33±0.4c     | 17.76±0.37ab    | 19.53±1.11a      | 16.13±0.47bc    | 18.03±1.52ab    | 20.13±0.92a     |
|                      | trans-3-hexen-1-ol     | 23.83±1.64b    | 26.03±1.7ab     | 29.13±1.15a      | 24.7±1.04b      | 26.7±1.73ab     | 28.7±0.52a      |
|                      | diethyl succinate      | 15.26±1.8a     | 8.66±1.1b       | 5.53±1.1b        | 15.3±3.68a      | 7.36±1.42b      | 7.73±0.8b       |
|                      | ethyl-2-methylbutyrate | 0.43±0.05a     | 0.2±0c          | 0.2±0c           | 0.23±0.05bc     | 0.16±0.05c      | 0.33±0.05ab     |
|                      | ethyl butyrate         | 172.13±3.11a   | 107.43±12.85b   | 98.2±20.1b       | 164.03±10.15a   | 101.5±15.51b    | 125.26±36.98ab  |
|                      | ethyl decanoate        | 229.53±41.45bc | 628.56±147.3ab  | 464.46±110.56abc | 659.83±202.13ab | 775.7±354.73a   | 122.56±15.96c   |
|                      | ethyl dodecanoate      | 25.16±6.27b    | 44.46±7.01ab    | 30.8±3.64b       | 55.53±20.88ab   | 69.83±19.24a    | 38.46±7.22ab    |
|                      | ethyl hexanoate        | 513.26±30.4a   | 145.13±10.68cd  | 150.73±10.58cd   | 257.73±32.65b   | 184.13±21.49c   | 98.93±4.09d     |
|                      | ethyl isovalerate      | 3.6±0.45a      | 3±0.72a         | 3.73±0.9a        | 4.53±0.35a      | 3.53±0.51a      | 3.86±0.15a      |
|                      | ethyl lactate          | 392.6±13.77a   | 261.03±27.91b   | 183.43±16.33c    | 406.83±36.56a   | 222.56±38.72bc  | 238.46±15.78bc  |
| <i>Fatty acids</i>   | ethyl octanoate        | 349.76±25.67a  | 84±4.56c        | 86.73±25.82c     | 199.46±69.22b   | 84.6±10.97c     | 35.86±6.63c     |
|                      | methyl salicilate      | 0.23±0.05a     | 0.3±0a          | 0.23±0.05a       | 0.23±0.05a      | 0.3±0a          | 0.4±0.17a       |
|                      | butanoic acid          | 408.76±1.69a   | 208.06±16.76c   | 210.6±14.32c     | 290.96±25.31b   | 211.66±16.67c   | 248.46±10.2bc   |
|                      | decanoic acid          | 1042±40.16b    | 1848.1±312.87ab | 1993.4±595.56ab  | 1583.03±194.21b | 3029.8±1029.11a | 1640.16±67.41ab |
|                      | hexanoic acid          | 1732.7±37.85a  | 489.2±59.28c    | 410.1±71.88c     | 898.86±106.72c  | 504.03±79.35b   | 340.36±22.07c   |
|                      | isobutyric acid        | 128.7±9a       | 79.46±7.48bc    | 79.63±9bc        | 94.8±1.57b      | 78.73±4.21bc    | 67.26±5.31c     |
|                      | isovaleric acid        | 315.36±22.66a  | 132.6±8.91b     | 122.7±5.98bc     | 159.3±15.32b    | 134.36±8.68b    | 88.53±17.66c    |
|                      | nonanoic acid          | 4.83±0.66a     | 5.03±0.64a      | 5.03±0.4a        | 4.9±0.55a       | 4.93±0.2a       | 3.23±0.2b       |
|                      | octanoic acid          | 2694.1±38.45a  | 684.5±96.4cd    | 667.03±100.16cd  | 1318.73±241.64b | 880.4±84.21c    | 475.93±31.47d   |
|                      | valeric acid           | 19.3±1.65a     | 12.13±1.12cd    | 11.9±1.03cd      | 14.73±0.64b     | 12.4±0.79c      | 8.4±0.2d        |
|                      | alpha terpineol        | 3.2±0.62b      | 4.76±0.46a      | 4.5±0.52ab       | 4.8±0.17a       | 5.5±0.55a       | 3.33±0.51b      |
| <i>Free Terpenes</i> | beta citronellol       | 19.83±0.92a    | 23.6±4.76a      | 17.83±1.61a      | 19.33±4.85a     | 22.33±3.62a     | 19.16±0.41a     |
|                      | geranic acid           | 15.06±0.77c    | 17.9±2.48c      | 18.73±2.77bc     | 19.26±0.75bc    | 23.63±2.87ab    | 26.46±1.59a     |
|                      | geraniol               | 58.63±3.81b    | 71.76±3.71ab    | 67.3±7.6ab       | 80.93±5.33a     | 70.06±8.64ab    | 73.63±6.3ab     |
|                      | linalol oxide A        | 3.86±0.45a     | 3.06±0.35ab     | 3.03±0.4ab       | 3.33±0.3ab      | 3.06±0.05ab     | 2.66±0.35b      |
|                      | linalol oxide B        | 2.53±0.55a     | 2.96±0.5a       | 3.26±0.15a       | 2.36±0.35a      | 2.83±0.2a       | 2.73±0.23a      |
|                      | linalool               | 5.36±0.25c     | 6.93±0.61bc     | 6.83±0.83bc      | 7.8±0.6ab       | 8.1±0.5ab       | 8.93±0.86a      |
|                      | nerol                  | 2±0.08a        | 2.27±0.21a      | 2.4±0.05a        | 2.04±0.18a      | 2.2±0.39a       | 2.13±0.11a      |
|                      | rose oxide I           | 0.4±0a         | 0.4±0a          | 0.4±0a           | 0.4±0a          | 0.43±0.05a      | 0.46±0.05a      |
|                      | rose oxide II          | 0.43±0.05a     | 0.43±0.05a      | 0.4±0.1a         | 0.4±0a          | 0.4±0a          | 0.4±0a          |
|                      | terpinen 4 ol          | 1.33±0.15b     | 3.03±0.76ab     | 2.3±0.5ab        | 3.23±0.9ab      | 4±2.16ab        | 4.4±0.09a       |

|               |                  |             |              |             |             |              |            |
|---------------|------------------|-------------|--------------|-------------|-------------|--------------|------------|
| <i>Others</i> | benzaldehyde     | 1.93±0.15b  | 2.03±0.05b   | 1.76±0.2b   | 2.03±0.05b  | 2.3±0.43ab   | 2.76±0.4a  |
|               | benzothiazole    | 1.63±0.28a  | 1.16±0.11a   | 1.33±0.32a  | 1.06±0.2a   | 1.23±0.41a   | 1.2±0.2b   |
|               | beta damascenone | 1.46±0.11a  | 1.1±0.09ab   | 0.96±0.2b   | 1.43±0.05a  | 1.13±0.15ab  | 0.96±0.15b |
|               | beta damascone   | 30.9±2.49ab | 24.46±2.4abc | 19.13±1.62c | 32.83±5.26a | 24.06±3.47bc | 21.8±1.65c |
|               | guaiacol         | 2.86±0.96a  | 2.5±0.45a    | 2.06±0.32a  | 2.36±0.5a   | 1.96±0.3a    | 2.76±0.11a |
|               | zingerone        | 4.13±0.15a  | 1.7±0.09b    | 2.2±0.62b   | 1.9±0.2b    | 1.96±0.47b   | 2.53±1.02b |

---
